# Supplementary figures and images for: Towards a More Reliable Identification of Isomeric Metabolites Using Pattern Guided Retention Validation
Source: MDPI journal article supplement (doi:10.3390/metabo10110457), 2020-11-12

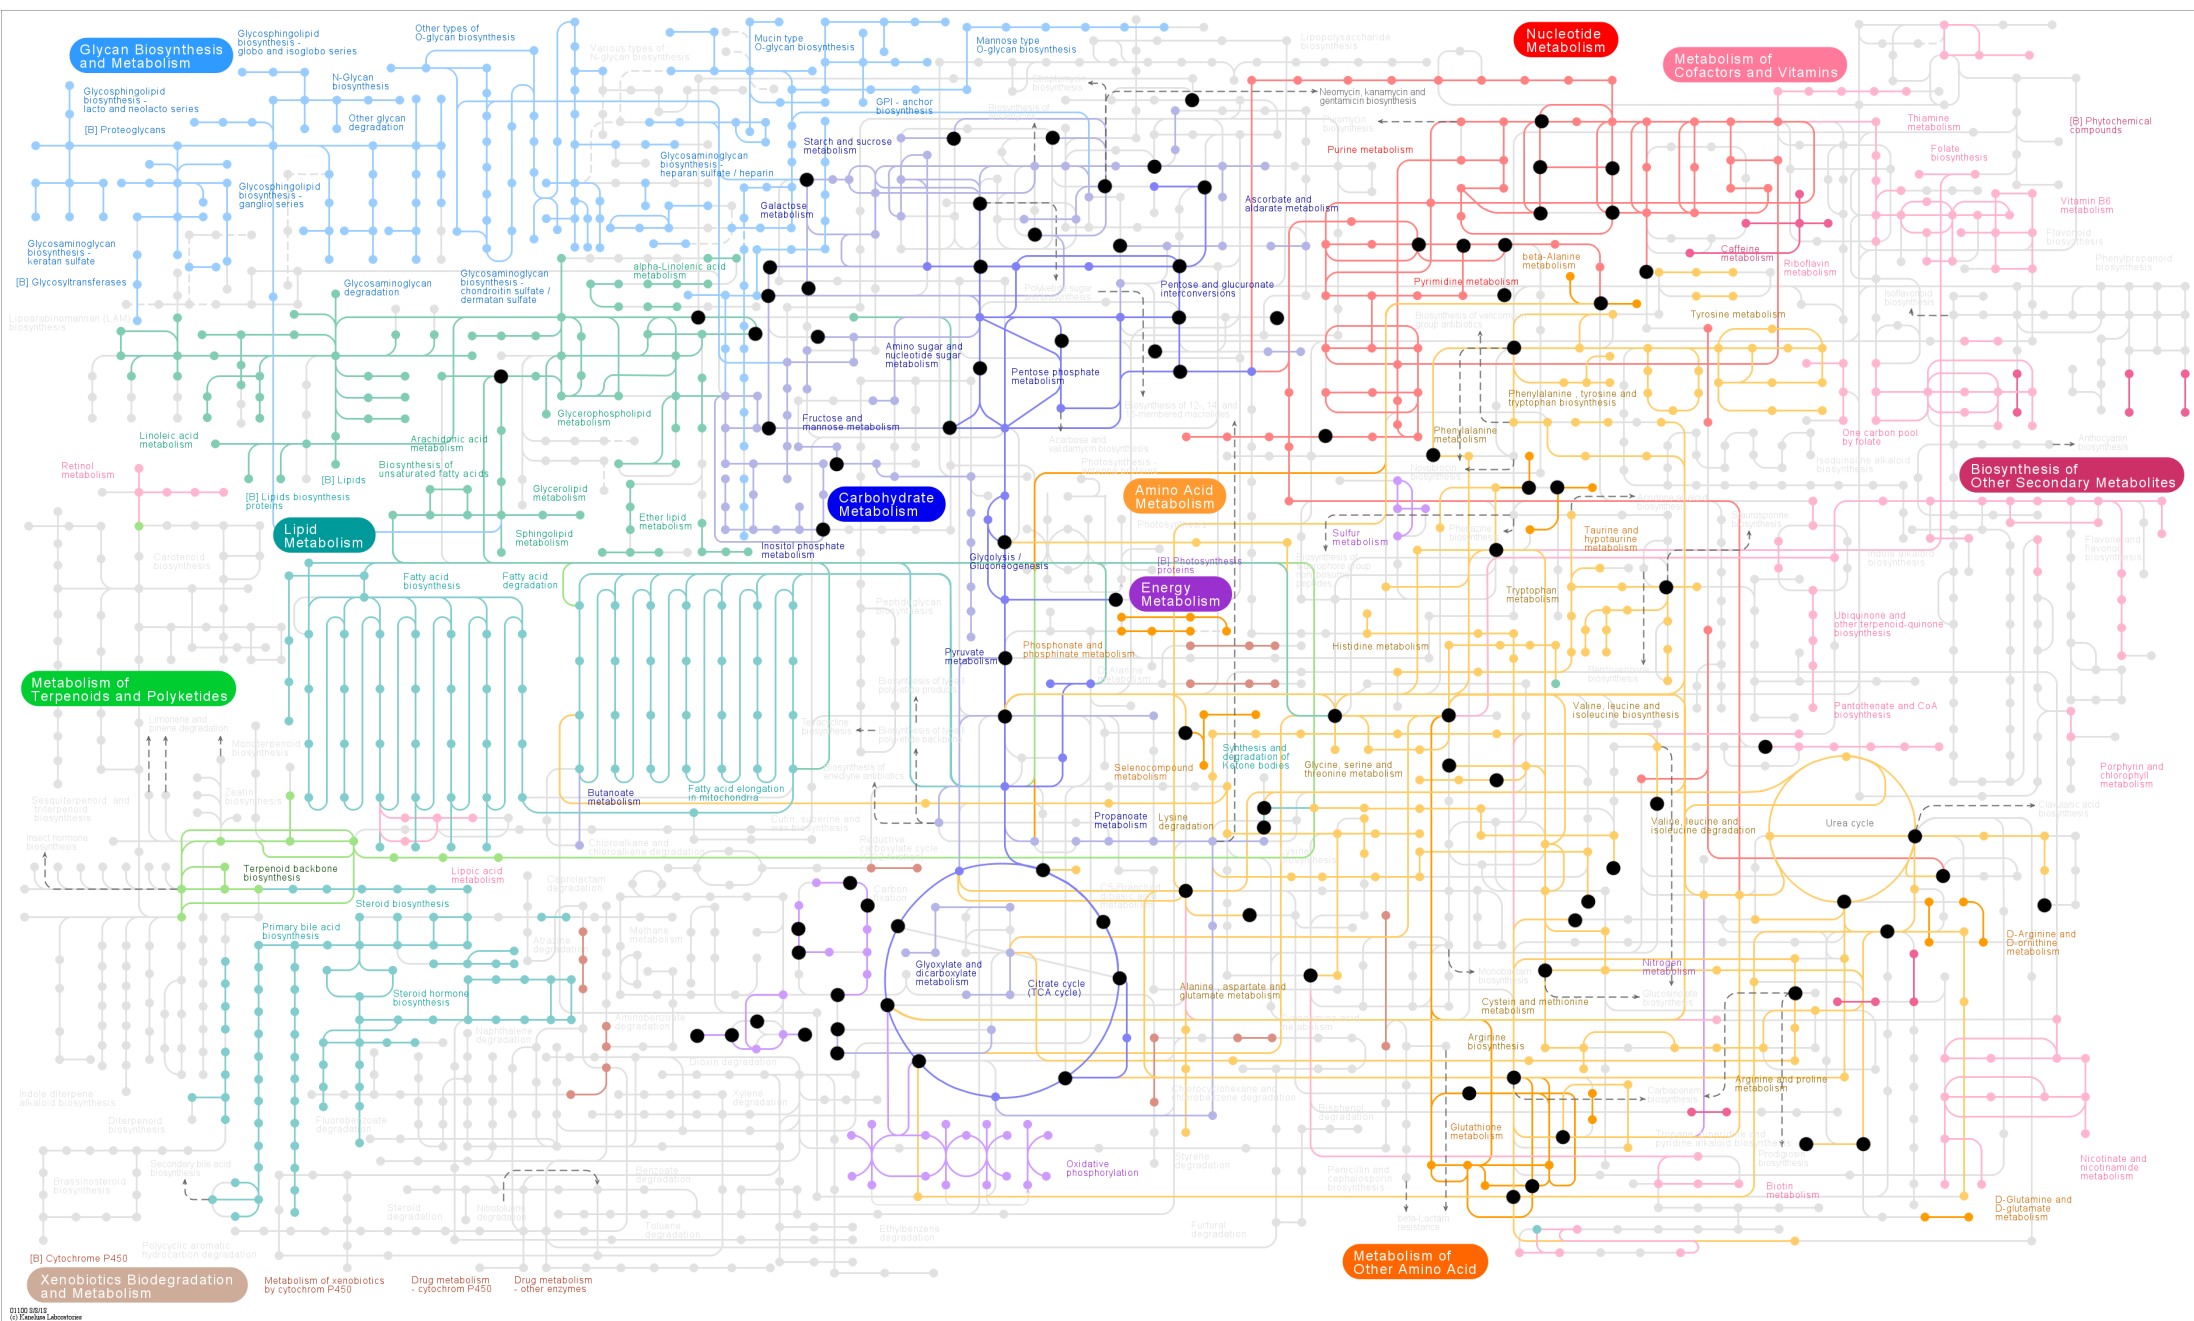

Supplement: s1 [file s1]
